# Supplementary material for: Calmodulin Interaction with hEAG1 Visualized by FRET Microscopy
Source: PubMed Central journal article supplement (PMC2877719; doi:10.1371/journal.pone.0010873), 2010-05-27
Supplement: pone.0010873.s001.pdf [file pone.0010873.s001.pdf]

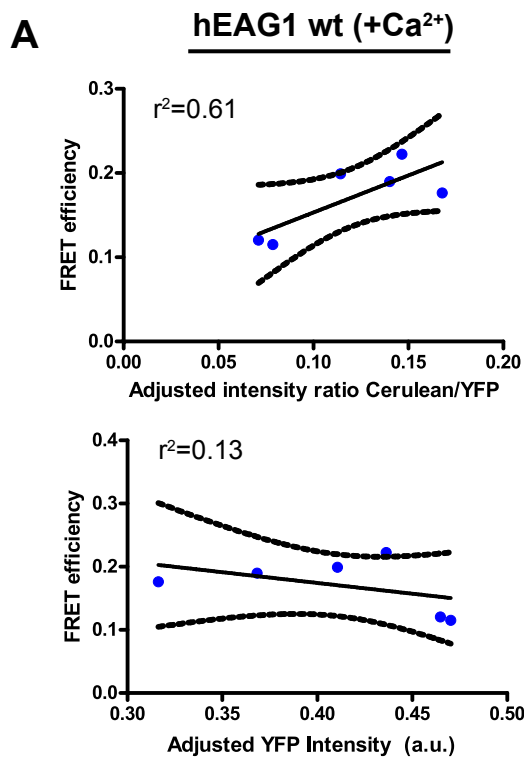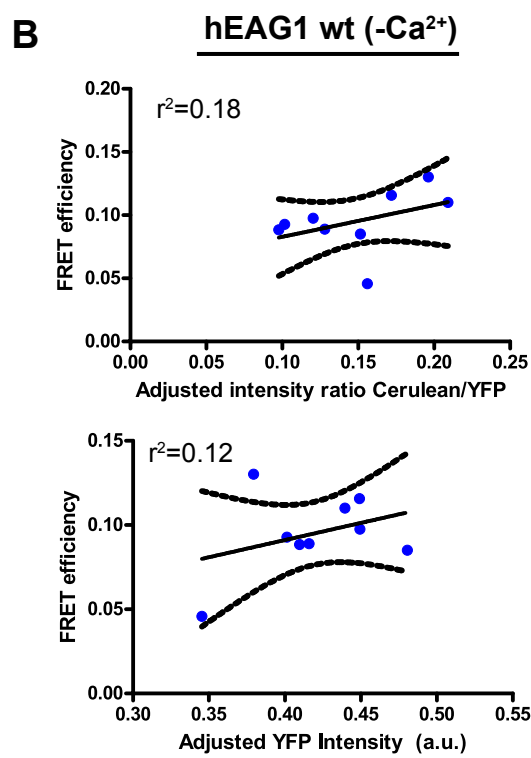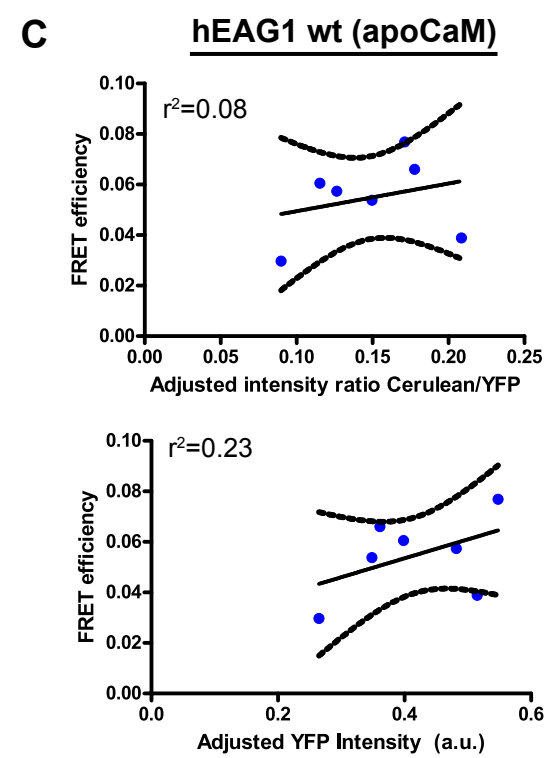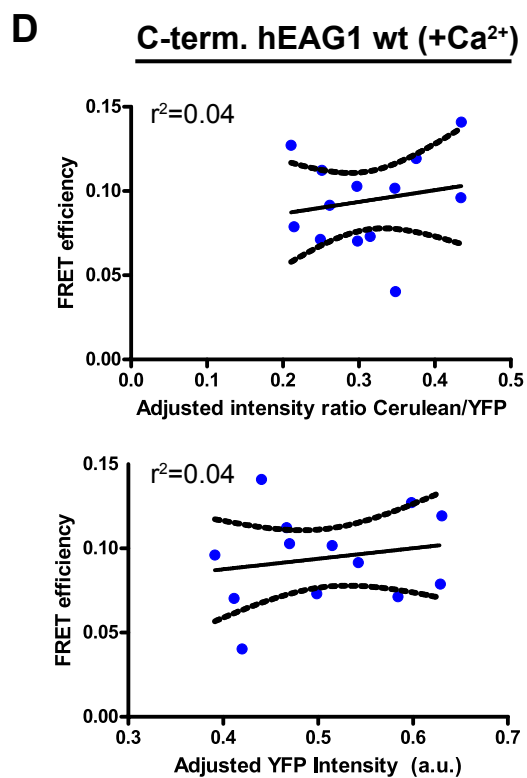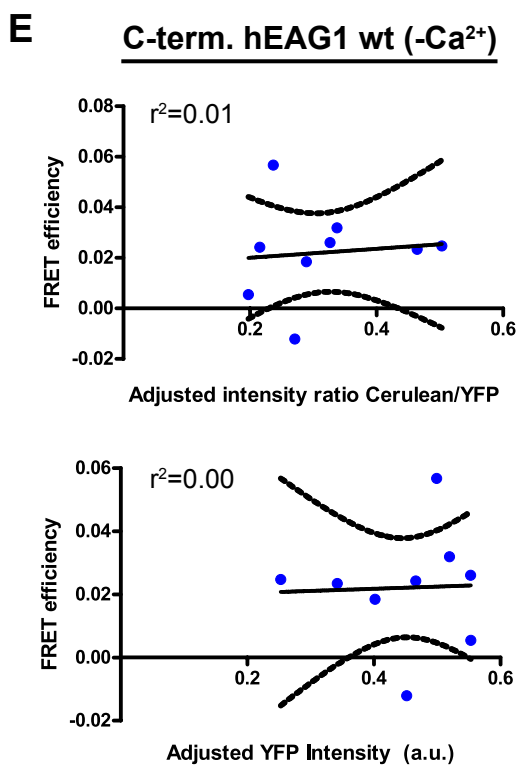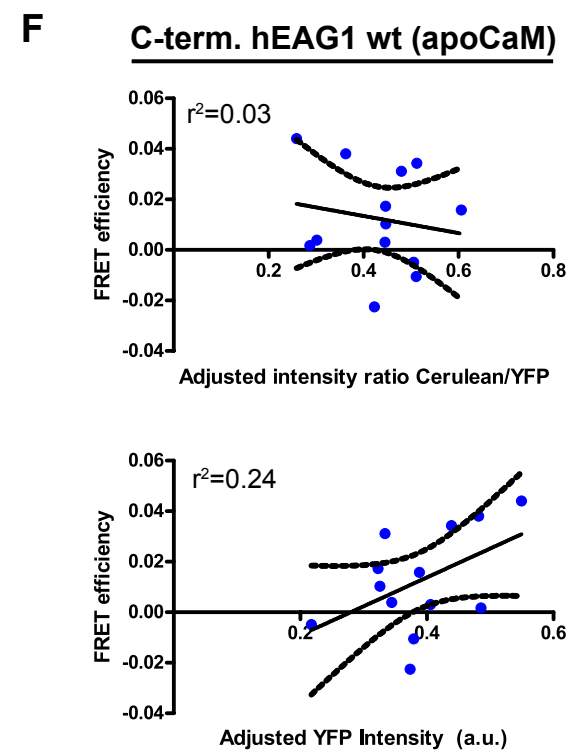

Figure S1
